# Supplementary material for: Exploring the Sources of Stress and Coping Strategies of Turkish Preschool Teachers
Source: MDPI journal article supplement (doi:10.3390/bs14010059), 2024-01-16
Supplement: s1 [file s1]

# SUPPLEMENTARY FILES

**Table S1.** Information about the participants

| Teachers | The Institution | Age group receiving Education | Institution  | Gender | Professional Seniority (Years) | Working Time | Availability of a Helper in the Class | Inclusion Student | Branch of the School Principal |
|----------|-----------------|-------------------------------|--------------|--------|--------------------------------|--------------|---------------------------------------|-------------------|--------------------------------|
| T1       | Private         | 0–3 years                     | Preschool    | Female | 4–7 years                      | Full day     | Yes                                   | None              | Other                          |
| T2       | Private         | 0–3 years                     | Preschool    | Female | 4–7 years                      | Full day     | Yes                                   | None              | Other                          |
| T3       | Private         | 0–3 years                     | Preschool    | Female | 1–3 years                      | Full day     | Yes                                   | None              | Preschool                      |
| T4       | Private         | 0–3 years                     | Preschool    | Female | 4–7 years                      | Full day     | Yes                                   | None              | Preschool                      |
| T5       | Private         | 0–3 years                     | Preschool    | Female | 1–3 years                      | Full day     | Yes                                   | Yes               | Preschool                      |
| T6       | Private         | 0–3 years                     | Preschool    | Female | 4–7 years                      | Full day     | Yes                                   | None              | Preschool                      |
| T7       | Private         | 3–4 years                     | Preschool    | Female | 4–7 years                      | Full day     | Yes                                   | None              | Other                          |
| T8       | Private         | 3–4 years                     | Preschool    | Female | 1–3 years                      | Full day     | Yes                                   | None              | Other                          |
| T9       | Private         | 3–4 years                     | Preschool    | Female | 12–15 years                    | Full day     | Yes                                   | Yes               | Preschool                      |
| T10      | Private         | 3–4 years                     | Preschool    | Female | 1–3 years                      | Full day     | Yes                                   | Yes               | Preschool                      |
| T11      | Private         | 3–4 years                     | Preschool    | Female | 1–3 years                      | Full day     | Yes                                   | Yes               | Preschool                      |
| T12      | Private         | 3–4 years                     | Preschool    | Female | 4–7 years                      | Full day     | Yes                                   | None              | Other                          |
| T13      | Private         | 4–6 years                     | Preschool    | Female | 12–15 years                    | Full day     | Yes                                   | None              | Preschool                      |
| T14      | Private         | 4–6 years                     | Preschool    | Female | 1–3 years                      | Full day     | Yes                                   | None              | Preschool                      |
| T15      | Private         | 4–6 years                     | Preschool    | Female | 1–3 years                      | Full day     | Yes                                   | None              | Preschool                      |
| T16      | Private         | 4–6 years                     | Preschool    | Female | 1–3 years                      | Full day     | Yes                                   | None              | Preschool                      |
| T17      | Private         | 4–6 years                     | Preschool    | Female | 4–7 years                      | Full day     | Yes                                   | None              | Other                          |
| T18      | Private         | 4–6 years                     | Preschool    | Female | 1–3 years                      | Full day     | Yes                                   | None              | Preschool                      |
| T19      | State           | 4–6 years                     | Preschool    | Female | 4–7 years                      | Half day     | None                                  | None              | Preschool                      |
| T20      | State           | 3–4 years                     | Preschool    | Female | 4–7 years                      | Half day     | None                                  | None              | Preschool                      |
| T21      | State           | 3–4 years                     | Preschool    | Female | 12–15 years                    | Half day     | None                                  | None              | Other                          |
| T22      | State           | 3–4 years                     | Preschool    | Female | 4–7 years                      | Half day     | None                                  | None              | Preschool                      |
| T23      | State           | 3–4 years                     | Preschool    | Female | 4–7 years                      | Half day     | None                                  | None              | Preschool                      |
| T24      | State           | 3–4 years                     | Preschool    | Female | 4–7 years                      | Half day     | Yes                                   | None              | Preschool                      |
| T25      | State           | 3–4 years                     | Preschool    | Female | 8–11 years                     | Half day     | Yes                                   | None              | Preschool                      |
| T26      | State           | 4–6 years                     | Preschool    | Female | 8–11 years                     | Half day     | Yes                                   | None              | Preschool                      |
| T27      | State           | 4–6 years                     | Preschool    | Female | 8–11 years                     | Half day     | Yes                                   | Yes               | Preschool                      |
| T28      | State           | 4–6 years                     | Preschool    | Female | 8–11 years                     | Half day     | Yes                                   | None              | Preschool                      |
| T29      | State           | 4–6 years                     | Preschool    | Female | 8–11 years                     | Half day     | Yes                                   | None              | Preschool                      |
| T30      | State           | 4–6 years                     | Preschool    | Female | 8–11 years                     | Half day     | Yes                                   | Yes               | Preschool                      |
| T31      | State           | 4–6 years                     | Kindergarten | Female | 8–11 years                     | Half day     | Yes                                   | Yes               | Other                          |
| T32      | State           | 4–6 years                     | Kindergarten | Female | 8–11 years                     | Half day     | None                                  | None              | Other                          |
| T33      | State           | 4–6 years                     | Kindergarten | Female | 16–19 years                    | Half day     | None                                  | None              | Other                          |
| T34      | State           | 4–6 years                     | Kindergarten | Female | 1–3 years                      | Half day     | None                                  | None              | Preschool                      |
| T35      | State           | 4–6 years                     | Kindergarten | Female | 12–15 years                    | Half day     | None                                  | None              | Other                          |
| T36      | State           | 4–6 years                     | Kindergarten | Female | 4–7 years                      | Half day     | None                                  | None              | Other                          |

Note: Table 1 contains demographic information of the participants.

**Table S2. COREQ results**

| Topic                                          | Item No. | Guide Questions/Description                                                                                                                              | Reported on Page No. |
|------------------------------------------------|----------|----------------------------------------------------------------------------------------------------------------------------------------------------------|----------------------|
| <b>Domain 1: Research team and reflexivity</b> |          |                                                                                                                                                          |                      |
| <i>Personal characteristics</i>                |          |                                                                                                                                                          |                      |
| Interviewer/facilitator                        | 1        | Which author/s conducted the interview or focus group?                                                                                                   | Page No. 6           |
| Credentials                                    | 2        | What were the researcher's credentials? E.g. PhD, MD                                                                                                     | PhD, Page No. 1      |
| Occupation                                     | 3        | What was their occupation at the time of the study?                                                                                                      | Page No. 1           |
| Gender                                         | 4        | Was the researcher male or female?                                                                                                                       | Male, Page No. 1     |
| Experience and training                        | 5        | What experience or training did the researcher have?                                                                                                     | Page No. 6           |
| <i>Relationship with participants</i>          |          |                                                                                                                                                          |                      |
| Relationship established                       | 6        | Was a relationship established prior to study commencement?                                                                                              | Page No. 6           |
| Participant knowledge of the interviewer       | 7        | What did the participants know about the researcher? e.g. personal goals, reasons for doing the research                                                 | Page No. 6           |
| Interviewer characteristics                    | 8        | What characteristics were reported about the interviewer/facilitator? e.g. Bias, assumptions, reasons, and interests in the research topic               | None                 |
| <b>Domain 2: Study design</b>                  |          |                                                                                                                                                          |                      |
| <i>Theoretical framework</i>                   |          |                                                                                                                                                          |                      |
| Methodological orientation and Theory          | 9        | What methodological orientation was stated to underpin the study? e.g. grounded theory, discourse analysis, ethnography, phenomenology, content analysis | Page No. 4           |
| <i>Participant selection</i>                   |          |                                                                                                                                                          |                      |
| Sampling                                       | 10       | How were participants selected? e.g. purposive, convenience, consecutive, snowball                                                                       | Page No. 4-5         |
| Method of approach                             | 11       | How were participants approached? e.g. face-to-face, telephone, mail, email                                                                              | Page No. 6           |
| Sample size                                    | 12       | How many participants were in the study?                                                                                                                 | Page No. 5           |
| Non-participation                              | 13       | How many people refused to participate or dropped out? Reasons?                                                                                          | Page No. 5           |
| <i>Setting</i>                                 |          |                                                                                                                                                          |                      |
| Setting of data collection                     | 14       | Where was the data collected? e.g. home, clinic, workplace                                                                                               | Page No. 6           |
| Presence of non-participants                   | 15       | Was anyone else present besides the participants and researchers?                                                                                        | None                 |
| Description of sample                          | 16       | What are the important characteristics of the sample? e.g. demographic data, date                                                                        | Page No. 5           |
| <i>Data collection</i>                         |          |                                                                                                                                                          |                      |
| Interview guide                                | 17       | Were questions, prompts, guides provided by the authors? Was it pilot tested?                                                                            | Page No. 6           |
| Repeat interviews                              | 18       | Were repeat inter views carried out? If yes, how many?                                                                                                   | None, Page No. 6     |
| Audio/visual recording                         | 19       | Did the research use audio or visual recording to collect the data?                                                                                      | Page No. 6           |
| Field notes                                    | 20       | Were field notes made during and/or after the interview or focus group?                                                                                  | None, Page No. 6     |
| Duration                                       | 21       | What was the duration of the inter views or focus group?                                                                                                 | Page No. 6           |
| Data saturation                                | 22       | Was data saturation discussed?                                                                                                                           | Page No. 6           |
| Transcripts returned                           | 23       | Were transcripts returned to participants for comment and/or correction                                                                                  | Page No. 6           |
| <b>Domain 3: Analysis and findings</b>         |          |                                                                                                                                                          |                      |
| <i>Data analysis</i>                           |          |                                                                                                                                                          |                      |

|                                |    |                                                                                                                                 |                  |
|--------------------------------|----|---------------------------------------------------------------------------------------------------------------------------------|------------------|
| Number of data coders          | 24 | How many data coders coded the data?                                                                                            | Page No. 6       |
| Description of the coding tree | 25 | Did authors provide a description of the coding tree?                                                                           | Page No. 6       |
| Derivation of themes           | 26 | Were themes identified in advance or derived from the data?                                                                     | Page No. 6       |
| Software                       | 27 | What software, if applicable, was used to manage the data?                                                                      | None, Page No. 6 |
| Participant checking           | 28 | Did participants provide feedback on the findings?                                                                              | None, Page No. 6 |
| <i>Reporting</i>               |    |                                                                                                                                 |                  |
| Quotations presented           | 29 | Were participant quotations presented to illustrate the themes/findings? Was each quotation identified? e.g. participant number | Page No. 7-11    |
| Data and findings consistent   | 30 | Was there consistency between the data presented and the findings?                                                              | Page No. 7-11    |
| Clarity of major themes        | 31 | Were major themes clearly presented in the findings?                                                                            | Page No. 7       |
| Clarity of minor themes        | 32 | Is there a description of diverse cases or discussion of minor themes?                                                          | Page No. 11-14   |

Form S1.

## INTERVIEW FORM/POESEDURE

Dear preschool teacher,

This interview is scheduled as part of a research endeavor entitled "An Investigation into Stress Sources and Coping Mechanisms among Preschool Teachers." Your perspectives will be treated with utmost confidentiality, solely employed for research purposes, and subjected to anonymization. Participation is voluntary, and you retain the right to withdraw from the interview at any stage of the data collection process. Our conversation will be documented via a voice recorder; Your confirmation of this recording process is imperative. Alternatively, you should prefer not to have your voice recorded, I will resort to noting our discussion. Your commitment to this process is greatly appreciated.

Doç. Dr. Sinan KOÇYİĞİT

Doç. Dr. Türker SEZER

Meeting date:

Meeting time:

### Introduction:

**The researcher introduces himself. Then asks questions to the participant.**

Let us commence by inviting you to provide an introduction about yourself.

Subsequently, I will be posing inquiries designed to elicit descriptive insights about your current professional background.

What is your professional seniority?

What are the characteristics of the institution you work for? (public/private)

Can you tell us about your working hours? (full day/half day)

What is the number and age group of children in your class?

Do you have a helper in the classroom?

Do you have an inclusion student in your class?

What is your school principal's area of expertise?

**Thank you for the information you provided. Now, I move on to asking you the questions that form the framework of our research. Please do not rush when answering the questions. Try to give examples from your experiences.**

## MAIN INTERVIEW QUESTIONS

1. What/what situations do you see as sources of stress while teaching? From where? Please explain.

2. In what situations do you experience stress as an educator?

a) Think about times of greatest stress. Can you describe these times?

b) Why do you think these times create stress?

3. How do you deal with stressors? What methods do you use? Please explain.

Is there anything you want to add?

Our meeting is over. Could you please listen to the conversation I recorded?

Do you approve of the recording and what you said/statements?

sincerely thank you for your participation. You can contact me when you want information about the results of the research.

Interview ending time:

Form S2.

# INTERVIEW SCHEDULE

|                  |                                                                          |                                                                               |                                                                               |                                                                             |                                                                           |                                                                              |
|------------------|--------------------------------------------------------------------------|-------------------------------------------------------------------------------|-------------------------------------------------------------------------------|-----------------------------------------------------------------------------|---------------------------------------------------------------------------|------------------------------------------------------------------------------|
|                  | Private school,<br>teachers of 0-<br>3-year-old<br>children<br>(nuresry) | Private<br>School,<br>teachers of 3-<br>4-year-old<br>children<br>(preschool) | Private<br>School,<br>teachers of<br>4-6 years old<br>children<br>(preschool) | Public<br>School,<br>teachers of<br>3-4-year-old<br>children<br>(preschool) | Public School,<br>teachers of 4-6-<br>year-old<br>children<br>(preschool) | Public School,<br>teachers of 4-6-<br>year-old<br>children<br>(kindergarten) |
| Date             | 20-22 May                                                                | 27-29 May                                                                     | 03-05 June                                                                    | 10-12 June                                                                  | 17-19 June                                                                | 24-26 June                                                                   |
| meeting<br>place | Teachers'<br>room                                                        | Teachers'<br>room                                                             | Teachers'<br>room                                                             | Teachers'<br>room                                                           | Teachers' room                                                            | Teachers' room                                                               |
